# Supplementary material
Source: MDPI journal article supplement (https://www.mdpi.com/2071-1050/14/4/2164)
Supplement: s1 [file s1]

# Development of Landscape Architecture Design Students' Pro-Environmental Awareness by Project-Based Learning

Juan Xi <sup>1</sup> and Xinjun Wang <sup>2,\*</sup>

<sup>1</sup> School of Foreign Studies, Changzhou University, Changzhou 213159, China; 00002043@cczu.edu.cn

<sup>2</sup> School of Art and Design, Changzhou Institute of Technology, Changzhou 213022, China

\* Correspondence: wxinjun@cit.edu.cn

| S1 Questionnaire and the result of Q1 - Q12 |     |                                                                                                       |
|---------------------------------------------|-----|-------------------------------------------------------------------------------------------------------|
|                                             | Q1  | The PBL approach is feasible.                                                                         |
|                                             | Q2  | The project has left a deep impression on me.                                                         |
|                                             | Q3  | The evaluation of my performance in the course is reasonable.                                         |
|                                             | Q4  | Communication with external tutors deepens my understanding of the industry.                          |
|                                             | Q5  | The PBL approach is recommendable for the learning of other courses.                                  |
|                                             | Q6  | Pro-environmental design is important to conserve urban environment.                                  |
|                                             | Q7  | Pro-environmental design helps to reduce the emission of carbon dioxide.                              |
|                                             | Q8  | Pro-environmental design helps to improve the welfare of city residents.                              |
|                                             | Q9  | I will use local materials in my landscape design.                                                    |
|                                             | Q10 | I will use precipitation collection methods in design to save water resources.                        |
|                                             | Q11 | I will use pro-environmental design in my future career.                                              |
|                                             | Q12 | Pro-environmental design is important for college students majoring in landscape architecture design. |

[illegible]

[illegible]

[illegible]
